# Supplementary material for: A fluorous synthetic receptor that recognizes perfluorooctanoic acid (PFOA) via fluorous interaction obtained by molecular imprinting
Source: Royal Society of Chemistry journal article supplement (doi:10.1039/c2an15936h), 2012-01-01
Supplement: c2an15936h.pdf [file c2an15936h.pdf]

## Supporting Information

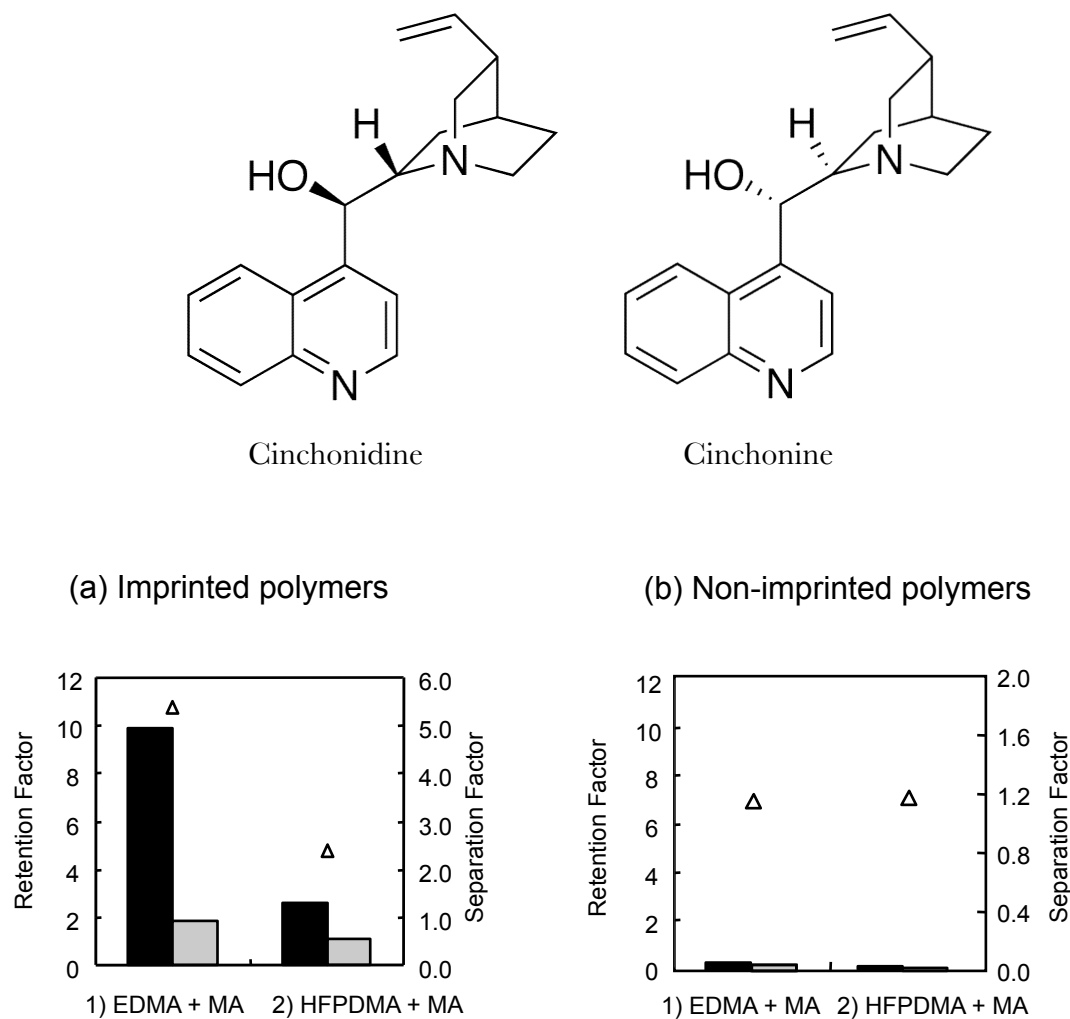

**Figure 1S.** Retention factor and selectivity factor ( $\Delta$ ) for cinchonidine ( $\blacksquare$ ) and its diastereomer cinchonine ( $\blacklozenge$ ) on (a) imprinted polymers and (b) non-imprinted blank polymers. The eluent was acetonitrile - acetic acid (97:3, v/v) at a flow rate of 1.0 mL min<sup>-1</sup>. The polymers were prepared with 1) ethylene glycol dimethacrylate (EDMA) and methacrylic acid (MA) or 2) 2,2,3,3,4,4,-hexafluoropentan-1,5-diyl dimethacrylate (HFPDMA). The cinchonidine-imprinted polymer prepared with HFPDMA as crosslinker exhibited a selectivity for cinchonidine, although the imprinted polymer prepared with EDMA showed a higher separation factor, suggesting that the longer crosslinker, HFPDMA, is too flexible but still useful as a crosslinker in molecular imprinting.
